# Supplementary material
Source: publisher figshare collection journal article supplement (https://acs.figshare.com/ndownloader/files/3841576)
Supplement: Supplementary file 1 [file 3841576]

## Supporting Information

### Properties of Cationic Pnictogen-bonded Complexes $F_{4-n}H_nP^+ : N$ -base with F-P $\cdots$ N linear and $n = 0 - 3$

Janet E. Del Bene,<sup>\*,‡</sup> Ibon Alkorta,<sup>\*,§</sup> and José Elguero<sup>§</sup>

Pgs. S2-S18 Table S1. Geometries, molecular graphs, and total energies of complexes  $F_{4-n}H_nP^+ : N$ -base

Pgs. S19-S20 Table S2. Table S2. The electron density at the BCP ( $\rho_{BCP}$ ), the Laplacian of the electron density at the BCP ( $\nabla^2\rho_{BCP}$ ), and the total energy density at the BCP ( $H_{BCP}$ ) of complexes  $F_{4-n}H_nP^+ : N$ -base

Pgs. S21-S22 Fig. S1. Plots of  $\rho_{BCP}$ ,  $\nabla^2\rho_{BCP}$ , and  $H_{BCP}$  (au) versus the P-N distance ( $\text{\AA}$ ) for complexes  $F_{4-n}H_nP^+ : N$ -base

Pgs. S23-S24 Table S3. Spin-spin coupling constants  $^1J(P-N)$  and their components (Hz) for complexes of  $F_4P^+$ ,  $F_3HP^+$ ,  $F_2H_2P^+$ , and  $FH_3P^+$  with nitrogen bases

Pgs. S25-S26 Table S4. Spin-spin coupling constants  $^1J(P-F_{ax})$  and their components (Hz) for complexes of  $F_4P^+$ ,  $F_3HP^+$ ,  $F_2H_2P^+$ , and  $FH_3P^+$  with nitrogen bases

Pg. S27 Full references 36 and 50.

Table S1. Geometries, molecular graphs, and total energies of complexes  $F_{4-n}H_nP^+ : N\text{-base}$

|                                                                                     |                                                                                                                                                                                                                                                                                                                                                                                                                                     |
|-------------------------------------------------------------------------------------|-------------------------------------------------------------------------------------------------------------------------------------------------------------------------------------------------------------------------------------------------------------------------------------------------------------------------------------------------------------------------------------------------------------------------------------|
| 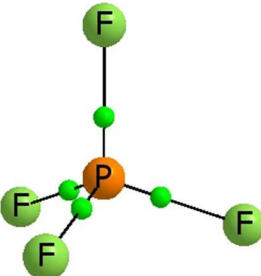   | <p>pf4_aug_td MP2= -739.65954193 NIMAG= 0<br/> P<br/> F,1,r1<br/> F,1,r1,2,109.47122063<br/> F,1,r1,2,109.47122063,3,120.,0<br/> F,1,r1,2,109.47122063,3,-120.,0<br/> <br/> r1=1.49191987</p>                                                                                                                                                                                                                                       |
|    | <p>pf4_nh3 MP2= -796.18769188 NIMAG= 0<br/> P,0.,0.0000000015,0.1507571317<br/> F,0.,0.0000000015,1.6919471686<br/> F,1.3267734873,0.7660130315,0.0255438038<br/> F,-1.3267734873,0.7660130315,0.0255438038<br/> F,0.,-1.5320260586,0.0255438038<br/> N,0.,0.0000000015,-1.7627659508<br/> H,-0.8245442564,-0.4760508469,-2.133161749<br/> H,0.8245442564,-0.4760508469,-2.133161749<br/> H,0.,0.9521016982,-2.133161749</p>        |
|   | <p>pf4_nh2cl MP2= -1255.24378714 NIMAG= 0<br/> P,0.,-0.0409523966,0.2115716282<br/> F,0.,-0.0484892386,1.7503432262<br/> F,1.3279542321,0.7094131776,0.0705794606<br/> F,-1.3279542321,0.7094131776,0.0705794606<br/> F,0.,-1.5726601408,0.0635319009<br/> N,0.,-0.0811559416,-1.7383864531<br/> H,-0.8261229229,-0.5787200923,-2.0863223624<br/> H,0.8261229229,-0.5787200923,-2.0863223624<br/> Cl,0.,1.4818687,-2.4975058907</p> |
|  | <p>pf4_nh2f MP2= -895.21899278 NIMAG= 0<br/> P,0.,-0.0104238134,0.2102950796<br/> F,0.,-0.0038143992,1.7434675594<br/> F,1.3146113775,0.7464847078,0.0356094023<br/> F,-1.3146113775,0.7464847078,0.0356094023<br/> F,0.,-1.5400608014,0.0606633903<br/> N,0.,-0.0800111835,-1.7588469262<br/> H,-0.8355750628,-0.5295559163,-2.1500923335<br/> H,0.8355750628,-0.5295559163,-2.1500923335<br/> F,0.,1.2004526277,-2.2695287267</p> |

|                                                                                     |                                                                                                                                                                                                                                                                                                                                                                                                                                       |
|-------------------------------------------------------------------------------------|---------------------------------------------------------------------------------------------------------------------------------------------------------------------------------------------------------------------------------------------------------------------------------------------------------------------------------------------------------------------------------------------------------------------------------------|
| 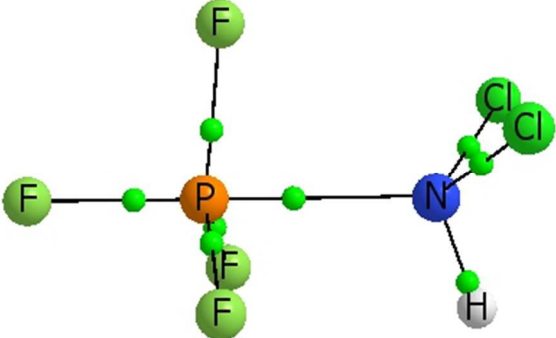   | <p>pf4_nhcl2 MP2= -1714.30686328 NIMAG= 0<br/> P,0.,0.0289697503,0.2731392367<br/> F,0.,0.0041632324,1.8082545746<br/> F,1.3015466138,0.8178274457,0.1188930711<br/> F,-1.3015466138,0.8178274457,0.1188930711<br/> F,0.,-1.4861594013,0.0890199577<br/> N,0.,0.0696289994,-1.7409932172<br/> Cl,-1.4355593172,-0.6471632628,-2.4171252567<br/> Cl,1.4355593172,-0.6471632628,-2.4171252567<br/> H,0.,1.0420735192,-2.0757879615</p>  |
|    | <p>pf4_ncl3 MP2= -2173.37359866 NIMAG= 0<br/> P,0.,0.0000000015,0.3384113304<br/> F,0.,0.0000000015,1.8698815219<br/> F,1.307531887,0.7549038884,0.1459921828<br/> F,-1.307531887,0.7549038884,0.1459921828<br/> F,0.,-1.5098077724,0.1459921828<br/> N,0.,0.0000000015,-1.7676262218<br/> Cl,-1.4236670875,-0.8219545747,-2.3703143197<br/> Cl,1.4236670875,-0.8219545747,-2.3703143197<br/> Cl,0.,1.6439091539,-2.3703143197</p>    |
|   | <p>pf4_nfcl2 MP2= -1813.35739233 NIMAG= 0<br/> P,0.,0.0234583154,0.3555988704<br/> F,0.,0.0436807515,1.8813089014<br/> F,1.2969486688,0.7753394958,0.1216115289<br/> F,-1.2969486688,0.7753394958,0.1216115289<br/> F,0.,-1.4834355003,0.1591969028<br/> N,0.,-0.0117994461,-1.7800322443<br/> Cl,-1.4195244059,-0.7231315416,-2.4589655622<br/> Cl,1.4195244059,-0.7231315416,-2.4589655622<br/> F,0.,1.3236855081,-2.1735239661</p> |
|  | <p>pf4_nhf2 MP2= -994.26989011 NIMAG= 0<br/> P,0.,0.0122683854,0.3062242552<br/> F,0.,-0.0298868941,1.8293461706<br/> F,1.2973274099,0.7797203169,0.1028779714<br/> F,-1.2973274099,0.7797203169,0.1028779714<br/> F,0.,-1.4790665639,0.0350524977<br/> N,0.,0.0815894863,-1.7906655237<br/> F,-1.0864784682,-0.5685510475,-2.2768201886<br/> F,1.0864784682,-0.5685510475,-2.2768201886<br/> H,0.,0.992759966,-2.2748480511</p>      |

|                                                                                     |                                                                                                                                                                                                                                                                                                                                                                                                                                                                                                                               |
|-------------------------------------------------------------------------------------|-------------------------------------------------------------------------------------------------------------------------------------------------------------------------------------------------------------------------------------------------------------------------------------------------------------------------------------------------------------------------------------------------------------------------------------------------------------------------------------------------------------------------------|
| 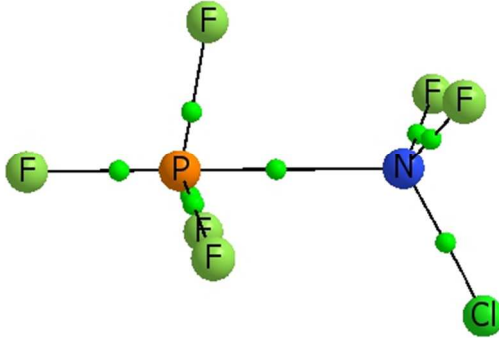   | <p>pf4_nf2cl MP2= -1453.34451633 NIMAG= 0<br/> P,0.,0.0194800259,0.383436494<br/> F,0.,-0.0336761026,1.8993833735<br/> F,1.2864839335,0.7709464491,0.1330347583<br/> F,-1.2864839335,0.7709464491,0.1330347583<br/> F,0.,-1.4523236268,0.050169388<br/> N,0.,0.0931890648,-1.8607609647<br/> F,-1.0761889968,-0.6053925902,-2.3311467212<br/> F,1.0761889968,-0.6053925902,-2.3311467212<br/> Cl,0.,1.6234369845,-2.6276199283</p>                                                                                            |
|    | <p>pf4_nf3 MP2= -1093.34199274 NIMAG= 0<br/> P,0.,0.0000000015,0.7798777276<br/> F,0.,0.0000000015,2.2757718819<br/> F,1.2304859567,0.7104213998,0.3225309107<br/> F,-1.2304859567,0.7104213998,0.3225309107<br/> F,0.,-1.4208427952,0.3225309107<br/> N,0.,0.0000000015,-2.1335890492<br/> F,-1.0646541916,-0.6146783826,-2.7108562968<br/> F,1.0646541916,-0.6146783826,-2.7108562968<br/> F,0.,1.2293567697,-2.7108562968</p>                                                                                              |
|   | <p>pf4_ncnh2 MP2= -888.25134561 NIMAG= 0<br/> P,-0.8379476027,-0.0009781895,0.<br/> F,-2.3827023151,0.0246018667,0.<br/> F,-0.7006782444,0.7456250821,-1.3286601787<br/> F,-0.7006782444,0.7456250821,1.3286601787<br/> F,-0.7277958549,-1.5252655736,0.<br/> N,1.0478770663,0.001793807,0.<br/> C,2.2120457639,-0.0007279634,0.<br/> N,3.5077279297,-0.0027395917,0.<br/> H,4.0158895328,0.0003562736,-0.8733317672<br/> H,4.0158895328,0.0003562736,0.8733317672</p>                                                        |
|  | <p>pf4_ncch3 MP2= -872.21292314 NIMAG= 0<br/> P,0.,0.0000000014,0.4696771735<br/> F,0.,0.0000000014,2.010031071<br/> F,-0.000000004,1.5190804408,0.3210249201<br/> F,1.315562253,-0.7595402148,0.3210249201<br/> F,-1.3155622489,-0.7595402218,0.3210249201<br/> N,0.,0.0000000014,-1.4539619487<br/> C,0.,0.0000000014,-2.612670101<br/> C,0.,0.0000000014,-4.0585980585<br/> H,-0.0000000027,1.0297237256,-4.4122802822<br/> H,0.8917669054,-0.5148618583,-4.4122802822<br/> H,-0.8917669026,-0.514861863,-4.4122802822</p> |

|                                                                                     |                                                                                                                                                                                                                                                                                                                                                                                                              |
|-------------------------------------------------------------------------------------|--------------------------------------------------------------------------------------------------------------------------------------------------------------------------------------------------------------------------------------------------------------------------------------------------------------------------------------------------------------------------------------------------------------|
| 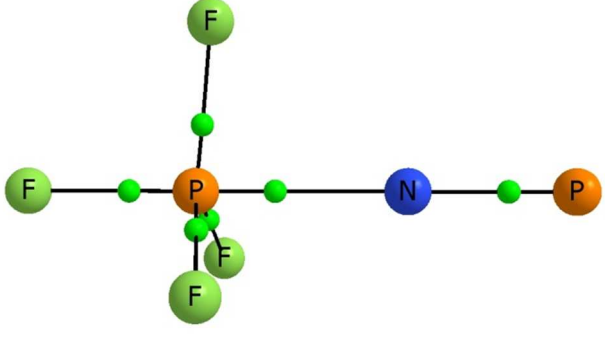   | <p>pf4_np MP2= -1135.24742146 NIMAG= 0<br/> P,0.,-0.2555218861,-0.1808117214<br/> F,0.,1.0037129832,0.7078808293<br/> F,1.3203031452,0.0691346358,-0.8834379069<br/> F,-1.3203031452,0.0691346358,-0.8834379069<br/> F,0.,-1.249087709,0.9830807684<br/> N,0.,-1.8206508797,-1.2872181735<br/> P,0.,-3.0472537726,-2.154175448</p>                                                                           |
|    | <p>pf4_ncoh MP2= -908.08992085 NIMAG= 1<br/> P,-0.8271792675,0.0263096331,0.<br/> F,-2.3662069545,0.0417775382,0.<br/> F,-0.6636979594,0.7857411601,-1.3115118365<br/> F,-0.6636979594,0.7857411601,1.3115118365<br/> F,-0.6902129082,-1.4929760736,0.<br/> N,1.1108196768,-0.0023398468,0.<br/> C,2.2716599031,-0.0115863489,0.<br/> O,3.5269374093,0.103888264,0.<br/> H,4.0058703249,-0.7481734083,0.</p> |
|   | <p>pf4_nccl MP2= -1292.07173883 NIMAG= 0<br/> P,0.,0.0000000014,0.4793974116<br/> F,0.,0.0000000014,2.0157065291<br/> F,-0.000000004,1.513456292,0.3108432955<br/> F,1.3106915971,-0.7567281404,0.3108432955<br/> F,-1.3106915931,-0.7567281474,0.3108432955<br/> N,0.,0.0000000014,-1.4854187639<br/> C,0.,0.0000000014,-2.6497028109<br/> Cl,0.,0.0000000014,-4.2461613929</p>                             |
|  | <p>pf4_nch MP2= -832.95645268 NIMAG= 0<br/> P,0.,0.0000000014,0.4549223268<br/> F,0.,0.0000000014,1.9847003612<br/> F,-0.000000004,1.5030514689,0.2502378095<br/> F,1.3016807561,-0.7515257289,0.2502378095<br/> F,-1.301680752,-0.7515257359,0.2502378095<br/> N,0.,0.0000000014,-1.5889827682<br/> C,0.,0.0000000014,-2.7442706777<br/> H,0.,0.0000000014,-3.8185907991</p>                                |
|  | <p>pf4_ncf MP2= -932.06268403 NIMAG= 0<br/> P,0.,0.0000000014,0.5099146081<br/> F,0.,0.0000000014,2.0356297413<br/> F,-0.000000004,1.4951821324,0.2814286479<br/> F,1.2948657107,-0.7475910607,0.2814286479<br/> F,-1.2948657067,-0.7475910675,0.2814286479<br/> N,0.,0.0000000014,-1.5978069885<br/> C,0.,0.0000000014,-2.7567673891<br/> F,0.,0.0000000014,-3.9944594672</p>                               |

|                                                                                   |                                                                                                                                                                                                                                                                                                                                                                                                                     |
|-----------------------------------------------------------------------------------|---------------------------------------------------------------------------------------------------------------------------------------------------------------------------------------------------------------------------------------------------------------------------------------------------------------------------------------------------------------------------------------------------------------------|
| 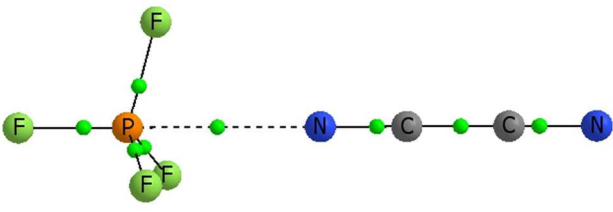 | <p>pf4_nccn MP2= -925.01640149 NIMAG= 0<br/> P,0.,0.0000000014,0.8337969281<br/> F,0.,0.0000000014,2.3371894777<br/> F,-0.0000000038,1.4390463186,0.4335005258<br/> F,1.2462506699,-0.7195231539,0.4335005258<br/> F,-1.246250666,-0.7195231605,0.4335005258<br/> N,0.,0.0000000014,-1.803213713<br/> C,0.,0.0000000014,-2.9741091004<br/> C,0.,0.0000000014,-4.3501998451<br/> N,0.,0.0000000014,-5.5278268347</p> |
|  | <p>pf4_n2 MP2= -849.03357885 NIMAG= 0<br/> P,0.,0.1098696292,0.0776431973<br/> F,0.,1.331146192,0.9404048488<br/> F,1.226273447,0.1353653303,-0.7710752362<br/> F,-1.226273447,0.1353653303,-0.7710752362<br/> F,0.,-1.090184164,0.9633973746<br/> N,0.,-2.3466633675,-1.6592040548<br/> N,0.,-3.2555968926,-2.3025785697</p>                                                                                       |

|                                                                                     |                                                                                                                                                                                                                                                                                                                                                                                                                                      |
|-------------------------------------------------------------------------------------|--------------------------------------------------------------------------------------------------------------------------------------------------------------------------------------------------------------------------------------------------------------------------------------------------------------------------------------------------------------------------------------------------------------------------------------|
| 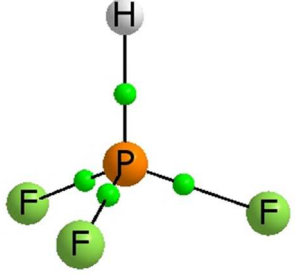  | <p>MP2=-640.4853667 NIMAG=0<br/> P<br/> H,1,r0<br/> F,1,r1,2,a1<br/> F,1,r1,2,a1,3,120.,0<br/> F,1,r1,2,a1,3,-120.,0<br/> <br/> r0=1.38272554<br/> r1=1.50203637<br/> a1=110.51974411</p>                                                                                                                                                                                                                                            |
|  | <p>phf3_B_nh3 MP2= -697.00415879 NIMAG= 0<br/> P,0.,-0.0370060333,0.1810198104<br/> F,0.,-0.0331950827,1.7339400616<br/> F,1.3135121137,0.7533739946,0.0380219867<br/> F,-1.3135121137,0.7533739946,0.0380219867<br/> H,0.,-1.4162900212,0.0658894141<br/> N,0.,-0.0126298368,-1.7926580017<br/> H,-0.8242973716,-0.4758672274,-2.1782345715<br/> H,0.8242973716,-0.4758672274,-2.1782345715<br/> H,0.,0.944110306,-2.1505488522</p> |

|                                                                                     |                                                                                                                                                                                                                                                                                                                                                                                                                                         |
|-------------------------------------------------------------------------------------|-----------------------------------------------------------------------------------------------------------------------------------------------------------------------------------------------------------------------------------------------------------------------------------------------------------------------------------------------------------------------------------------------------------------------------------------|
| 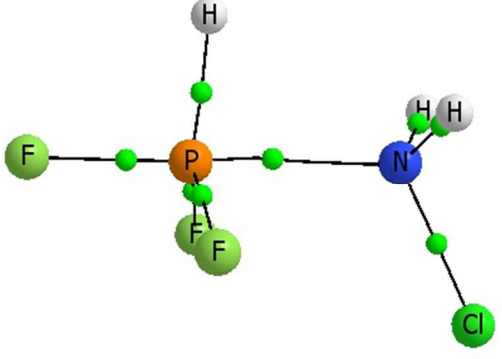   | <p>phf3_B_nh2cl MP2= -1156.06132705 NIMAG= 0<br/> P,0.,-0.0768266963,0.249232616<br/> F,0.,-0.0919025257,1.7971965803<br/> F,1.3080690032,0.7055515255,0.0878321087<br/> F,-1.3080690032,0.7055515255,0.0878321087<br/> H,0.,-1.4545710997,0.0965686056<br/> N,0.,-0.0949209615,-1.7720062004<br/> H,-0.8254077896,-0.5833305983,-2.1334307479<br/> H,0.8254077896,-0.5833305983,-2.1334307479<br/> Cl,0.,1.473777635,-2.5216883104</p> |
|    | <p>phf3_B_nh2f MP2= -796.03667802 NIMAG= 0<br/> P,0.,-0.0597347311,0.2600497939<br/> F,0.,-0.0539642938,1.8024123908<br/> F,1.2977595769,0.7220967275,0.0592506317<br/> F,-1.2977595769,0.7220967275,0.0592506317<br/> H,0.,-1.4349583905,0.1018577543<br/> N,0.,-0.0863364978,-1.8030978885<br/> H,-0.832249736,-0.5124947736,-2.2246840564<br/> H,0.832249736,-0.5124947736,-2.2246840564<br/> F,0.,1.2157980604,-2.2716010442</p>    |
|  | <p>phf3_B_nhcl2 MP2= -1615.13247167 NIMAG= 0<br/> P,0.,0.0179191201,0.301343523<br/> F,0.,-0.1216348183,1.8365239014<br/> F,1.2727618051,0.8567442582,0.167117823<br/> F,-1.2727618051,0.8567442582,0.167117823<br/> H,0.,-1.3359560642,0.0012558877<br/> N,0.,0.0893854109,-1.7813983588<br/> Cl,-1.4327819193,-0.6972387023,-2.3714412336<br/> Cl,1.4327819193,-0.6972387023,-2.3714412336<br/> H,0.,1.0312900363,-2.1925752589</p>   |
|  | <p>phf3_B_ncl3 MP2= -2074.20147042 NIMAG= 0<br/> P,0.,-0.0159756418,0.3683727483<br/> F,0.,-0.148966066,1.8990688804<br/> F,1.2700026506,0.8082805171,0.198363019<br/> F,-1.2700026506,0.8082805171,0.198363019<br/> H,0.,-1.3609048065,0.0359432985<br/> N,0.,0.0156514516,-1.7978764031<br/> Cl,-1.4216745663,-0.8598015375,-2.3250889108<br/> Cl,1.4216745663,-0.8598015375,-2.3250889108<br/> Cl,0.,1.6132294445,-2.4853850056</p>  |



|                                                                                     |                                                                                                                                                                                                                                                                                                                                                                                                                                         |
|-------------------------------------------------------------------------------------|-----------------------------------------------------------------------------------------------------------------------------------------------------------------------------------------------------------------------------------------------------------------------------------------------------------------------------------------------------------------------------------------------------------------------------------------|
| 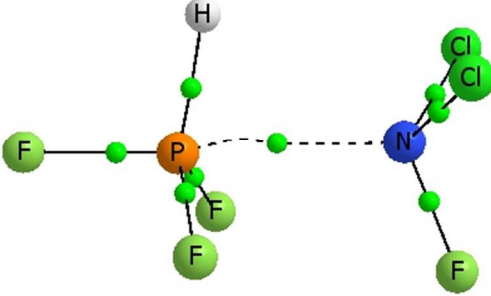   | <p>phf3_B_nfc12 MP2= -1714.18355434 NIMAG= 0<br/> P,0.,0.0076594662,0.4087438674<br/> F,0.,-0.0713284305,1.9371473372<br/> F,1.26521183,0.8146205683,0.1758382284<br/> F,-1.26521183,0.8146205683,0.1758382284<br/> H,0.,-1.3374424084,0.0879079393<br/> N,0.,-0.0059258637,-1.8218930771<br/> Cl,-1.419994474,-0.7622532368,-2.4557934525<br/> Cl,1.419994474,-0.7622532368,-2.4557934525<br/> F,0.,1.3022831084,-2.2848270429</p>     |
|    | <p>phf3_nfc12_FP MP2= -1714.18355434 NIMAG= 0<br/> P,0.,0.0076594662,0.4087438674<br/> F,0.,-0.0713284305,1.9371473372<br/> F,1.26521183,0.8146205683,0.1758382284<br/> F,-1.26521183,0.8146205683,0.1758382284<br/> H,0.,-1.3374424084,0.0879079393<br/> N,0.,-0.0059258637,-1.8218930771<br/> Cl,-1.419994474,-0.7622532368,-2.4557934525<br/> Cl,1.419994474,-0.7622532368,-2.4557934525<br/> F,0.,1.3022831084,-2.2848270429</p>    |
|   | <p>phf3_B_nhf2 MP2= -895.09614651 NIMAG= 0<br/> P,0.,0.0079647051,0.3985113355<br/> F,0.,-0.1734502413,1.9132892303<br/> F,1.2625604206,0.8258858952,0.2000421047<br/> F,-1.2625604206,0.8258858952,0.2000421047<br/> H,0.,-1.300380267,-0.0429114207<br/> N,0.,0.1085916367,-1.8688710164<br/> F,-1.088122825,-0.6129160012,-2.2777691135<br/> F,1.088122825,-0.6129160012,-2.2777691135<br/> H,0.,0.9313322142,-2.4879871239</p>      |
|  | <p>phf3_B_nf2cl MP2= -1354.17235851 NIMAG= 0<br/> P,0.,0.0035885038,0.493765561<br/> F,0.,-0.1903277206,1.9993897531<br/> F,1.2483832648,0.8166434583,0.2452598186<br/> F,-1.2483832648,0.8166434583,0.2452598186<br/> H,0.,-1.2753630296,-0.0227839709<br/> N,0.,0.1129282462,-1.9394694787<br/> F,-1.0776776733,-0.6334509135,-2.3661336858<br/> F,1.0776776733,-0.6334509135,-2.3661336858<br/> Cl,0.,1.5640029296,-2.8415140498</p> |
|  | <p>phf3_B_nf3 MP2= -994.16851739 NIMAG= 0<br/> P,0.,-0.0098031541,0.7339549965<br/> F,0.,-0.0775947619,2.2395371153<br/> F,1.2273290468,0.7619692998,0.3349642118<br/> F,-1.2273290468,0.7619692998,0.3349642118<br/> H,0.,-1.2937592654,0.2312565609<br/> N,0.,-0.0553783839,-2.0990120549<br/> F,-1.0651663664,-0.643120479,-2.7023326833<br/> F,1.0651663664,-0.643120479,-2.7023326833<br/> F,0.,1.1987926317,-2.6143533647</p>     |



|                                                                                     |                                                                                                                                                                                                                                                                                                                                                                                                                                                                                                                                                                                     |
|-------------------------------------------------------------------------------------|-------------------------------------------------------------------------------------------------------------------------------------------------------------------------------------------------------------------------------------------------------------------------------------------------------------------------------------------------------------------------------------------------------------------------------------------------------------------------------------------------------------------------------------------------------------------------------------|
| 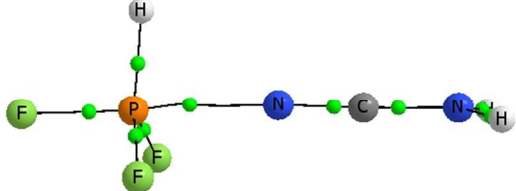   | <p>phf3_B_ncnh2 MP2= -789.07195798 NIMAG= 0<br/> P,-0.9074562443,-0.0328207044,0.<br/> F,-2.4576214879,0.0059004841,0.<br/> F,-0.7143967094,0.7518126888,-1.2974757657<br/> F,-0.7143967094,0.7518126888,1.2974757657<br/> H,-0.7804534158,-1.4035694917,0.<br/> N,1.0936008071,-0.0978364986,0.<br/> C,2.2600098433,-0.0550987135,0.<br/> N,3.5610274091,-0.0461727962,0.<br/> H,4.062103987,0.0573319839,-0.8703800213<br/> H,4.062103987,0.0573319839,0.8703800213</p>                                                                                                           |
|    | <p>phf3_B_ncch3 MP2= -773.03446909 NIMAG= 0<br/> P,-0.0000000028,0.0279676889,0.5628989684<br/> F,-0.0000000007,0.0579278212,2.106662368<br/> H,-0.0000000057,1.3876985625,0.3502018688<br/> F,1.2844945953,-0.769130086,0.373017749<br/> F,-1.2844945959,-0.7691300925,0.3730177422<br/> N,0.0000000026,0.0366452503,-1.5024772919<br/> C,0.0000000057,0.0243536214,-2.6644054607<br/> C,0.0000000095,0.005014355,-4.112570918<br/> H,0.0000000079,1.0279487747,-4.4841821982<br/> H,0.8907430218,-0.5146479369,-4.4607253907<br/> H,-0.8907429983,-0.5146479414,-4.4607253954</p> |
|   | <p>phf3_B_np MP2= -1036.06791940 NIMAG= 0<br/> P,0.,-0.2357317988,-0.1275895161<br/> F,0.,1.0159965037,0.7830845528<br/> F,1.2925685504,0.0841063346,-0.8788490082<br/> F,-1.2925685504,0.0841063346,-0.8788490082<br/> H,0.,-1.1727499085,0.8850883695<br/> N,0.,-1.8932777766,-1.2974808355<br/> P,0.,-3.1128164776,-2.183360849</p>                                                                                                                                                                                                                                              |
|  | <p>phf3_B_ncoh MP2= -808.91277322 NIMAG= 0<br/> P,0.9483421439,0.0177298902,0.<br/> F,2.4866872592,0.0811534226,0.<br/> H,0.6802607036,1.3665426302,0.<br/> F,0.7510743545,-0.7854651856,-1.2751790153<br/> F,0.7510743545,-0.7854651856,1.2751790153<br/> N,-1.1715987182,0.0162671884,0.<br/> C,-2.3369105509,0.0162270755,0.<br/> O,-3.5985775176,0.1394716263,0.<br/> H,-4.069834036,-0.7147447572,0.</p>                                                                                                                                                                       |
|  | <p>phf3_B_nccl MP2= -1192.89553520 NIMAG= 0<br/> P,-0.0000000041,0.0225507816,0.6190057569<br/> F,-0.0000000083,0.0647072462,2.1502953658<br/> H,-0.0000000068,1.3629928656,0.3171353488<br/> F,1.2654261712,-0.7708362467,0.3672477809<br/> F,-1.2654261741,-0.7708362532,0.3672477742<br/> N,0.0000000017,0.0635894751,-1.610877057<br/> C,0.0000000049,0.0332088755,-2.7796458687<br/> Cl,0.0000000093,-0.0064022556,-4.3842995187</p>                                                                                                                                           |

|                                                                                     |                                                                                                                                                                                                                                                                                                                                                                                                                                                                                       |
|-------------------------------------------------------------------------------------|---------------------------------------------------------------------------------------------------------------------------------------------------------------------------------------------------------------------------------------------------------------------------------------------------------------------------------------------------------------------------------------------------------------------------------------------------------------------------------------|
| 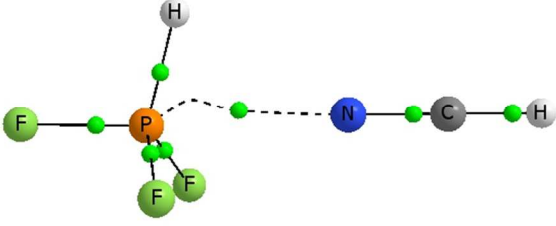   | <p>phf3_B_nch MP2= -733.78242109 NIMAG= 0<br/> P,-0.0000000018,0.016292037,0.6381196491<br/> F,-0.0000000006,0.0803660284,2.1593671081<br/> H,-0.0000000042,1.332680536,0.2468261687<br/> F,1.2498888219,-0.7734345023,0.338190558<br/> F,-1.2498888198,-0.7734345088,0.3381905513<br/> N,0.0000000045,0.0673405691,-1.7633225792<br/> C,0.0000000077,0.0383815181,-2.9237140153<br/> H,0.0000000106,0.0101736236,-3.9952056683</p>                                                   |
|    | <p>phf3_B_ncf MP2= -832.89044477 NIMAG= 0<br/> P,-0.0000000031,0.0119426896,0.7002354952<br/> F,-0.0000000072,0.0841952343,2.2174400185<br/> H,-0.0000000052,1.3162702164,0.2697349543<br/> F,1.2426900798,-0.7764821376,0.3785349018<br/> F,-1.2426900804,-0.7764821438,0.3785348953<br/> N,0.0000000031,0.0911947107,-1.7768030539<br/> C,0.0000000063,0.0470911897,-2.9414762194<br/> F,0.0000000096,0.0013858205,-4.1864153218</p>                                                |
|   | <p>phf3_B_nccn MP2= -825.84445957 NIMAG= 0<br/> P,-0.0000000041,0.0108480146,0.8011777499<br/> F,-0.0000000083,0.0897736783,2.3137446952<br/> H,-0.0000000062,1.3039066358,0.334732664<br/> F,1.2366344171,-0.7744484345,0.4561055573<br/> F,-1.2366344196,-0.7744484407,0.4561055508<br/> N,0.0000000024,0.0967946521,-1.7770617181<br/> C,0.0000000056,0.0587719352,-2.9474831059<br/> C,0.0000000093,0.0133507606,-4.3224524975<br/> N,0.0000000125,-0.023671784,-5.4997527005</p> |
|  | <p>phf3_B_n2 MP2= -749.86017760 NIMAG= 0<br/> P,0.,0.0792385996,0.0641405361<br/> F,0.,1.2424669527,1.0205546408<br/> F,1.2228816341,0.2103020181,-0.7989683278<br/> F,-1.2228816341,0.2103020181,-0.7989683278<br/> H,0.,-1.1023522534,0.7748715113<br/> N,0.,-2.3733820359,-1.5478863698<br/> N,0.,-3.2484539586,-2.2369001709</p>                                                                                                                                                  |
|  | <p>MP2=-541.3030215 NIMAG=0<br/> P<br/> X,1,1.<br/> F,1,r1,2,a1<br/> F,1,r1,2,a1,3,180.,0<br/> H,1,r2,2,a2,3,90.,0<br/> H,1,r2,2,a2,3,-90.,0<br/><br/> r1=1.51576987<br/> r2=1.38832146<br/> a1=54.28363185<br/> a2=122.42874339</p>                                                                                                                                                                                                                                                  |

|                                                                                     |                                                                                                                                                                                                                                                                                                                                                                                                                                        |
|-------------------------------------------------------------------------------------|----------------------------------------------------------------------------------------------------------------------------------------------------------------------------------------------------------------------------------------------------------------------------------------------------------------------------------------------------------------------------------------------------------------------------------------|
| 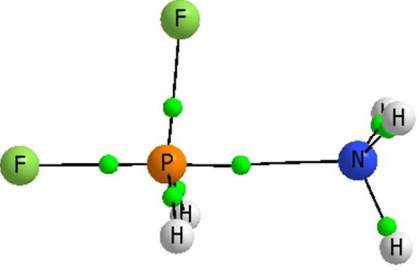   | <p>ph2f2_nh3 MP2= -597.82004848 NIMAG= 0<br/> P,0.,0.0385440648,0.2152629671<br/> F,0.,0.0380082289,1.7816634808<br/> H,1.2117377934,0.6922781534,0.066693235<br/> H,-1.2117377934,0.6922781534,0.066693235<br/> F,0.,-1.5002884043,0.0543433737<br/> N,0.,0.0185531414,-1.8200385623<br/> H,-0.816941519,-0.467456538,-2.1912416322<br/> H,0.816941519,-0.467456538,-2.1912416322<br/> H,0.,0.9555409753,-2.225011429</p>             |
|    | <p>ph2f2_nh2cl MP2= -1056.88421556 NIMAG= 0<br/> P,0.,-0.0191443026,0.264638668<br/> F,0.,0.0615431245,1.8212901552<br/> H,1.2036692974,0.6294247933,0.0414505009<br/> H,-1.2036692974,0.6294247933,0.0414505009<br/> F,0.,-1.5630770969,0.1608032314<br/> N,0.,-0.1135690988,-1.8012587958<br/> H,-0.8237956139,-0.5737377034,-2.1976321508<br/> H,0.8237956139,-0.5737377034,-2.1976321508<br/> Cl,0.,1.5228662948,-2.3750821755</p> |
|   | <p>ph2f2_nh2f MP2= -696.85925516 NIMAG= 0<br/> P,0.,0.0075185223,0.279014376<br/> F,0.,0.1045180422,1.8292437128<br/> H,1.2006258403,0.6474755046,0.0253553857<br/> H,-1.2006258403,0.6474755046,0.0253553857<br/> F,0.,-1.5320564566,0.1678634106<br/> N,0.,-0.102419533,-1.8229687894<br/> H,-0.8286572419,-0.5041523634,-2.271238986<br/> H,0.8286572419,-0.5041523634,-2.271238986<br/> F,0.,1.2357750301,-2.2044614207</p>        |
|  | <p>ph2f2_nhcl2 MP2= -1515.94871411 NIMAG= 0<br/> P,0.,0.0613668607,0.343918081<br/> F,0.,0.089707148,1.8964603915<br/> H,1.2232027608,0.6759289089,0.1227662088<br/> H,-1.2232027608,0.6759289089,0.1227662088<br/> F,0.,-1.4571867047,0.1263472661<br/> N,0.,0.1182739856,-1.8012011258<br/> Cl,-1.4452093719,-0.6160944543,-2.4310284526<br/> Cl,1.4452093719,-0.6160944543,-2.4310284526<br/> H,0.,1.0681585864,-2.1924197642</p>   |
|  | <p>ph2f2_ncl3 MP2= -1975.02311931 NIMAG= 0<br/> P,0.,0.0216334359,0.3710380247<br/> F,0.,0.1506654713,1.9146104499<br/> H,1.2168203056,0.6215879409,0.0824449834<br/> H,-1.2168203056,0.6215879409,0.0824449834<br/> F,0.,-1.5076669053,0.2375153553<br/> N,0.,-0.0109955818,-1.8013440111<br/> Cl,-1.4294814788,-0.7870761845,-2.42664417<br/> Cl,1.4294814788,-0.7870761845,-2.42664417<br/> Cl,0.,1.6772860813,-2.2665645763</p>    |

|                                                                                     |                                                                                                                                                                                                                                                                                                                                                                                                                                                                        |
|-------------------------------------------------------------------------------------|------------------------------------------------------------------------------------------------------------------------------------------------------------------------------------------------------------------------------------------------------------------------------------------------------------------------------------------------------------------------------------------------------------------------------------------------------------------------|
| 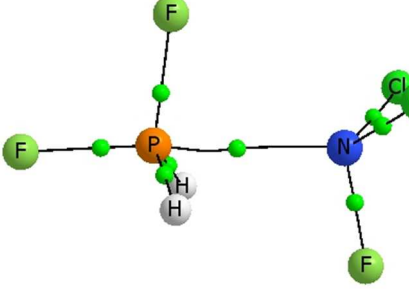   | <p>ph2f2_nfc12 MP2= -1615.00573337 NIMAG= 0<br/> P,0.,0.0421826196,0.4017656362<br/> F,0.,0.1830025072,1.9388782931<br/> H,1.2092321891,0.6377805077,0.0799824898<br/> H,-1.2092321891,0.6377805077,0.0799824898<br/> F,0.,-1.4837234722,0.2577585267<br/> N,0.,-0.0181319694,-1.8153731338<br/> Cl,-1.4238122101,-0.6759301054,-2.5255896653<br/> Cl,1.4238122101,-0.6759301054,-2.5255896653<br/> F,0.,1.3529022518,-2.1249022421</p>                                |
|    | <p>ph2f2_nhf2 MP2= -795.91382829 NIMAG= 0<br/> P,0.,0.0410525557,0.4937532916<br/> F,0.,-0.0041890196,2.0262264373<br/> H,1.1969501467,0.6595315232,0.1846401175<br/> H,-1.1969501467,0.6595315232,0.1846401175<br/> F,0.,-1.4270329144,0.0937267767<br/> N,0.,0.183558735,-1.9387778829<br/> F,-1.0928547931,-0.5430798628,-2.3453495691<br/> F,1.0928547931,-0.5430798628,-2.3453495691<br/> H,0.,0.9736949418,-2.5969373136</p>                                     |
|   | <p>ph2f2_nf2cl MP2= -1254.99206919 NIMAG= 0<br/> P,0.,0.0385748784,0.457918531<br/> F,0.,0.0873910435,1.9910111658<br/> H,1.1958433905,0.6464791699,0.1164409973<br/> H,-1.1958433905,0.6464791699,0.1164409973<br/> F,0.,-1.4570034594,0.1621991311<br/> N,0.,0.0992103751,-1.9163339479<br/> F,-1.0765476829,-0.5742998591,-2.4286449076<br/> F,1.0765476829,-0.5742998591,-2.4286449076<br/> Cl,0.,1.6686630914,-2.6227018954</p>                                   |
|  | <p>ph2f2_nf3 MP2= -894.98753838 NIMAG= 0<br/> P,0.,0.018850921,0.6474857864<br/> F,0.,0.1269482443,2.1666943769<br/> H,1.1812814495,0.5975257999,0.2146685844<br/> H,-1.1812814495,0.5975257999,0.2146685844<br/> F,0.,-1.4676930036,0.3340624825<br/> N,0.,0.0254363297,-2.0282762126<br/> F,-1.0644012322,-0.5815000951,-2.6032340484<br/> F,1.0644012322,-0.5815000951,-2.6032340484<br/> F,0.,1.2647611397,-2.5859054303</p>                                       |
|  | <p>ph2f2_ncnh2 MP2= -689.89144710 NIMAG= 0<br/> P,-0.9668754415,0.0301979687,0.<br/> F,-2.5254813873,0.0355613125,0.<br/> H,-0.7570152939,0.6566892308,-1.2108232197<br/> H,-0.7570152939,0.6566892308,1.2108232197<br/> F,-0.752785093,-1.4894752777,0.<br/> N,1.1220777888,0.1161257061,0.<br/> C,2.290188972,0.0679087909,0.<br/> N,3.5950553845,0.0624517287,0.<br/> H,4.0912503963,-0.0744226396,-0.8680747459<br/> H,4.0912503963,-0.0744226396,0.8680747459</p> |

|                                                                                     |                                                                                                                                                                                                                                                                                                                                                                                                                                                                                                                                                    |
|-------------------------------------------------------------------------------------|----------------------------------------------------------------------------------------------------------------------------------------------------------------------------------------------------------------------------------------------------------------------------------------------------------------------------------------------------------------------------------------------------------------------------------------------------------------------------------------------------------------------------------------------------|
| 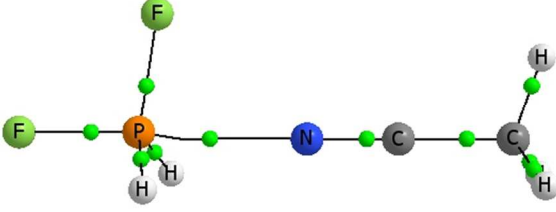   | ph2f2_ncch3 MP2= -673.85460217 NIMAG= 0<br>P,0.0000000001,-0.0288253848,0.6284146757<br>F,0.0000000002,-0.0612313551,2.1799731931<br>F,-0.0000000039,1.4866241497,0.4099250252<br>H,1.2053148537,-0.6494582504,0.3756949721<br>H,-1.2053148503,-0.6494582568,0.3756949721<br>N,0.0000000002,-0.0657190848,-1.5335755223<br>C,0.0000000001,-0.039731666,-2.6970302185<br>C,0.,-0.005079357,-4.1464021579<br>H,-0.0000000027,1.0315548176,-4.4775377551<br>H,0.8900359621,-0.5093377969,-4.5172225712<br>H,-0.8900359594,-0.5093378016,-4.5172225712 |
|    | ph2f2_np MP2= -936.88738443 NIMAG= 0<br>P,0.,-0.1625496902,-0.1574776135<br>F,0.,1.1226029936,0.7203928432<br>H,1.2089503707,0.0177288551,-0.8006239466<br>H,-1.2089503707,0.0177288551,-0.8006239466<br>F,0.,-1.2036659766,0.9714013848<br>N,0.,-1.8818112675,-1.3951215417<br>P,0.,-3.1380850971,-2.2343795819                                                                                                                                                                                                                                   |
|   | ph2f2_ncoh MP2= -709.73346184 NIMAG= 0<br>P,-0.9847753027,0.0568496763,0.<br>F,-2.5305793836,0.1357434732,0.<br>H,-0.6891222227,0.6631169141,-1.2023699937<br>H,-0.6891222227,0.6631169141,1.2023699937<br>F,-0.7882792045,-1.4593124478,0.<br>N,1.2303121604,0.0493816278,0.<br>C,2.3971389922,0.0207646262,0.<br>O,3.6649089898,0.1116356708,0.<br>H,4.1087423058,-0.7562090158,0.                                                                                                                                                               |
|  | ph2f2_nccl MP2= -1093.71663333 NIMAG= 0<br>P,0.0000000001,-0.0264194293,0.6424968807<br>F,0.0000000002,-0.0740566715,2.1847432182<br>F,-0.0000000039,1.4787178268,0.3896248697<br>H,1.1992258192,-0.6340575241,0.3349414595<br>H,-1.1992258158,-0.6340575305,0.3349414595<br>N,0.0000000002,-0.0827956215,-1.6316076931<br>C,0.0000000001,-0.041415477,-2.801091386<br>Cl,0.,0.0135434071,-4.4067797836                                                                                                                                            |
|  | ph2f2_nch MP2= -634.60350271 NIMAG= 0<br>P,0.0000000001,-0.0240643141,0.61391474<br>F,0.0000000002,-0.0887477286,2.1505422728<br>F,-0.0000000039,1.4763232928,0.3483195528<br>H,1.1943670749,-0.6236787711,0.2720666866<br>H,-1.1943670716,-0.6236787774,0.2720666866<br>N,0.0000000002,-0.0730835362,-1.7417872817<br>C,0.0000000001,-0.0384813455,-2.9020074506<br>H,0.,-0.0055784342,-3.9736311591                                                                                                                                              |
|  | ph2f2_ncf MP2= -733.71135622 NIMAG= 0<br>P,0.0000000001,-0.0216617329,0.6588016065<br>F,0.0000000002,-0.0900358824,2.1924618613<br>F,-0.0000000004,1.4746997398,0.3789080872<br>H,1.1916229214,-0.616628342,0.2989016682<br>H,-1.1916229181,-0.6166283485,0.2989016682<br>N,0.0000000003,-0.0925375238,-1.7380486981<br>C,0.0000000001,-0.04372522,-2.9022091127                                                                                                                                                                                   |

|  |                                                                                                                                                                                                                                                                                                                                                                                                                                                   |
|--|---------------------------------------------------------------------------------------------------------------------------------------------------------------------------------------------------------------------------------------------------------------------------------------------------------------------------------------------------------------------------------------------------------------------------------------------------|
|  | F,0.,0.0053789536,-4.1458329298                                                                                                                                                                                                                                                                                                                                                                                                                   |
|  | ph2f2_nccn MP2= -726.66498291 NIMAG= 0<br>P,0.0000000001,-0.0202551718,0.7391847964<br>F,0.0000000002,-0.0923758409,2.2691877624<br>F,-0.0000000039,1.4713200067,0.4412983251<br>H,1.1879873421,-0.6119175481,0.3585882036<br>H,-1.1879873388,-0.6119175544,0.3585882036<br>N,0.0000000003,-0.09641842,-1.7281247439<br>C,0.0000000002,-0.056566176,-2.898114842<br>C,0.,-0.010029639,-4.2725471614<br>N,-0.0000000001,0.0281915324,-5.4500893533 |
|  | ph2f2_n2 MP2= -650.67886217 NIMAG= 0<br>P,0.,0.0530221625,0.018885577<br>F,0.,1.3599072315,0.7962194291<br>H,1.1757522869,0.0078081534,-0.711505448<br>H,-1.1757522869,0.0078081534,-0.711505448<br>F,0.,-1.0701381916,1.0387045133<br>N,0.,-2.202858361,-1.67191579<br>N,0.,-3.1353588292,-2.2810594315                                                                                                                                          |

|  |                                                                                                                                                                                                                                                                                                                                                                                                       |
|--|-------------------------------------------------------------------------------------------------------------------------------------------------------------------------------------------------------------------------------------------------------------------------------------------------------------------------------------------------------------------------------------------------------|
|  | MP2=-442.0587919 NIMAG=0<br>P<br>X,1,1.<br>F,1,r1,2,90.<br>H,1,r2,2,a2,3,d2,0<br>H,1,r2,2,a2,3,-d2,0<br>H,3,r3,1,a3,2,0.,0<br><br>r1=1.93459344<br>r2=1.40974625<br>r3=0.94630091<br>a2=132.98873028<br>a3=118.0345022<br>d2=86.84070803                                                                                                                                                              |
|  | ph3f_nh3 MP2= -498.64287768 NIMAG= 0<br>P,0.,0.0000000015,0.2596251954<br>F,0.,0.0000000015,1.8417799426<br>H,1.188302307,0.6860666583,0.0725681274<br>H,-1.188302307,0.6860666583,0.0725681274<br>H,0.,-1.3721333122,0.0725681274<br>N,0.,0.0000000015,-1.8483352863<br>H,-0.8158941765,-0.4710567209,-2.2378966927<br>H,0.8158941765,-0.4710567209,-2.2378966927<br>H,0.,0.9421134463,-2.2378966927 |



|                                                                                     |                                                                                                                                                                                                                                                                                                                                                                                                                                     |
|-------------------------------------------------------------------------------------|-------------------------------------------------------------------------------------------------------------------------------------------------------------------------------------------------------------------------------------------------------------------------------------------------------------------------------------------------------------------------------------------------------------------------------------|
| 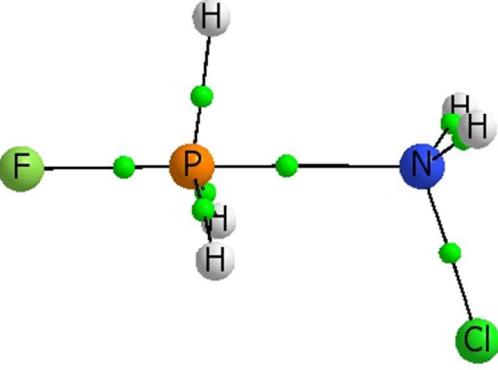   | <p>ph3f_nh2cl MP2= -957.70612825 NIMAG= 0<br/> P,0.,-0.0573667893,0.3094557711<br/> F,0.,0.017739937,1.8823610994<br/> H,1.1800032603,0.6235273045,0.054112648<br/> H,-1.1800032603,0.6235273045,0.054112648<br/> H,0.,-1.438036965,0.1671663574<br/> N,0.,-0.1246162737,-1.8240047487<br/> H,-0.8209573272,-0.5765948045,-2.23395611<br/> H,0.8209573272,-0.5765948045,-2.23395611<br/> Cl,0.,1.5084203469,-2.4171394214</p>       |
|    | <p>ph3f_nh2f MP2= -597.68260426 NIMAG= 0<br/> P,0.,-0.0317118346,0.3264102922<br/> F,0.,0.0777937782,1.8908536647<br/> H,1.1760987183,0.6371274162,0.0298134965<br/> H,-1.1760987183,0.6371274162,0.0298134965<br/> H,0.,-1.4109799596,0.1845047595<br/> N,0.,-0.1212230539,-1.8499756405<br/> H,-0.8248194525,-0.5066363465,-2.3177224452<br/> H,0.8248194525,-0.5066363465,-2.3177224452<br/> F,0.,1.2251354942,-2.2189670327</p> |
|   | <p>ph3f_nhcl2 MP2= -1416.77606370 NIMAG= 0<br/> P,0.,0.0449307529,0.3533651607<br/> F,0.,-0.0411297093,1.9203900018<br/> H,1.1868827938,0.7358968794,0.1517424174<br/> H,-1.1868827938,0.7358968794,0.1517424174<br/> H,0.,-1.3037607388,0.027647802<br/> N,0.,0.1143711357,-1.8091711223<br/> Cl,-1.4405236057,-0.6637279199,-2.3940799129<br/> Cl,1.4405236057,-0.6637279199,-2.3940799129<br/> H,0.,1.0412556537,-2.25023818</p> |
|  | <p>ph3f_ncl3 MP2= -1875.84816920 NIMAG= 0<br/> P,0.,0.0000000015,0.3865046824<br/> F,0.,0.0000000015,1.9528036209<br/> H,1.1811963602,0.681964038,0.1246551716<br/> H,-1.1811963602,0.681964038,0.1246551716<br/> H,0.,-1.3639280715,0.1246551716<br/> N,0.,0.0000000015,-1.8022317255<br/> Cl,-1.427222438,-0.8240072573,-2.3811140299<br/> Cl,1.427222438,-0.8240072573,-2.3811140299<br/> Cl,0.,1.6480145191,-2.3811140299</p>   |



|                                                                                     |                                                                                                                                                                                                                                                                                                                                                                                                                                       |
|-------------------------------------------------------------------------------------|---------------------------------------------------------------------------------------------------------------------------------------------------------------------------------------------------------------------------------------------------------------------------------------------------------------------------------------------------------------------------------------------------------------------------------------|
| 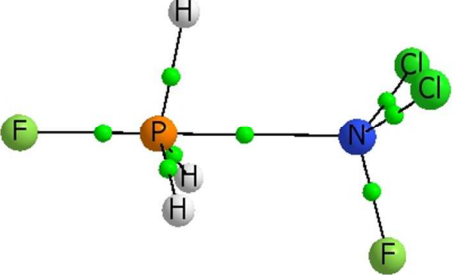   | <p>ph3f_nfc12 MP2= -1515.83104806 NIMAG= 0<br/> P,0.,0.0208523173,0.4148353154<br/> F,0.,0.0600511931,1.9749560674<br/> H,1.1772109514,0.6909302316,0.1117714615<br/> H,-1.1772109514,0.6909302316,0.1117714615<br/> H,0.,-1.3441091841,0.1632038959<br/> N,0.,-0.0137724707,-1.8148054509<br/> Cl,-1.4234169446,-0.7171566078,-2.4942566914<br/> Cl,1.4234169446,-0.7171566078,-2.4942566914<br/> F,0.,1.329433887,-2.2054414521</p> |
|    | <p>ph3f_nhf2 MP2= -696.74152187 NIMAG= 0<br/> P,0.,0.0311575214,0.4325577505<br/> F,0.,-0.1179176826,1.9796653825<br/> H,1.1700315618,0.7317413647,0.1850399219<br/> H,-1.1700315618,0.7317413647,0.1850399219<br/> H,0.,-1.281000916,-0.0156383394<br/> N,0.,0.1392138126,-1.8874932801<br/> F,-1.0909646571,-0.5871571712,-2.2936853966<br/> F,1.0909646571,-0.5871571712,-2.2936853966<br/> H,0.,0.9393843325,-2.5344131401</p>    |
|   | <p>ph3f_nf2cl MP2= -1155.81853705 NIMAG= 0<br/> P,0.,0.0200492886,0.4384127818<br/> F,0.,-0.055045956,1.9892195624<br/> H,1.167204443,0.7103437611,0.145887411<br/> H,-1.167204443,0.7103437611,0.145887411<br/> H,0.,-1.3109957705,0.0463495364<br/> N,0.,0.1015163856,-1.8927001241<br/> F,-1.0773097884,-0.6069402759,-2.3655326776<br/> F,1.0773097884,-0.6069402759,-2.3655326776<br/> Cl,0.,1.6188823181,-2.6935599845</p>      |
|  | <p>ph3f_nf3 MP2= -795.81305537 NIMAG= 0<br/> P,0.,0.0000000015,0.5816299898<br/> F,0.,0.0000000015,2.1246049228<br/> H,1.1562599702,0.6675670066,0.2023301956<br/> H,-1.1562599702,0.6675670066,0.2023301956<br/> H,0.,-1.3351340086,0.2023301956<br/> N,0.,0.0000000015,-1.9654495971<br/> F,-1.0652802176,-0.6150398189,-2.5303962626<br/> F,1.0652802176,-0.6150398189,-2.5303962626<br/> F,0.,1.2300796423,-2.5303962626</p>      |
|  | <p>ph3f_ncnh2 MP2= -590.71685869 NIMAG= 0<br/> P,1.3086107002,-0.008146257,0.<br/> F,2.8813025039,-0.0208554966,0.<br/> H,1.0624904769,0.6733986379,-1.1766664425<br/> H,1.0465629022,-1.3648421219,0.<br/> H,1.0624904769,0.6733986379,1.1766664425<br/> N,-0.8465071044,0.0212953155,0.<br/> C,-2.015811261,0.0154808033,0.<br/> N,-3.3242264405,-0.0392774479,0.<br/> H,-3.8198435238,0.1188501147,-0.8645526029</p>               |

|                                                                                     |                                                                                                                                                                                                                                                                                                                                                                                                                                                                                                    |
|-------------------------------------------------------------------------------------|----------------------------------------------------------------------------------------------------------------------------------------------------------------------------------------------------------------------------------------------------------------------------------------------------------------------------------------------------------------------------------------------------------------------------------------------------------------------------------------------------|
|                                                                                     | H,-3.8198435238,0.1188501147,0.8645526029                                                                                                                                                                                                                                                                                                                                                                                                                                                          |
| 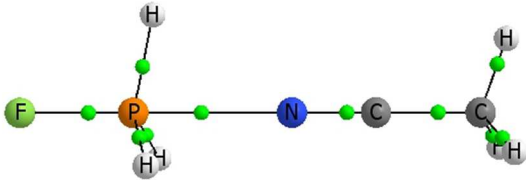   | ph3f_ncch3 MP2= -574.68078852 NIMAG= 0<br>P,0.,0.0000000014,0.655386858<br>F,0.,0.0000000014,2.223381736<br>H,-0.0000000036,1.3554238258,0.3844543269<br>H,1.1738314666,-0.6777119077,0.3844543269<br>H,-1.173831463,-0.6777119139,0.3844543269<br>N,0.,0.0000000014,-1.5419430258<br>C,0.,0.0000000014,-2.706112659<br>C,0.,0.0000000014,-4.1568552662<br>H,-0.0000000027,1.0271931572,-4.5155024626<br>H,0.8895753689,-0.5135965742,-4.5155024626<br>H,-0.8895753662,-0.5135965788,-4.5155024626 |
|    | ph3f_np MP2= -837.71327399 NIMAG= 0<br>P,0.,-0.1589921934,-0.1128508232<br>F,0.,1.1240912158,0.7943990932<br>H,1.1779383201,0.0274342318,-0.8139472543<br>H,-1.1779383201,0.0274342318,-0.8139472543<br>H,0.,-1.1502561117,0.8524044659<br>N,0.,-1.93227015,-1.3655729651<br>P,0.,-3.1676480507,-2.2383984953                                                                                                                                                                                      |
|   | ph3f_ncoh MP2= -610.55958240 NIMAG= 0<br>P,1.3237766235,-0.0043864573,0.<br>F,2.8878264081,0.0322570194,0.<br>H,1.0036057853,1.3404538471,0.<br>H,1.0516512229,-0.6868633408,-1.1705692276<br>H,1.0516512229,-0.6868633408,1.1705692276<br>N,-0.9107639057,-0.0429984144,0.<br>C,-2.0778417509,-0.0115013762,0.<br>O,-3.340926572,0.1432780881,0.<br>H,-3.8269466639,-0.7011536149,0.                                                                                                              |
|  | ph3f_nccl MP2= -994.54312966 NIMAG= 0<br>P,0.,0.0000000014,0.6439788884<br>F,0.,0.0000000014,2.2051075788<br>H,-0.0000000036,1.349218933,0.34108106<br>H,1.1684578718,-0.6746094612,0.34108106<br>H,-1.1684578682,-0.6746094675,0.34108106<br>N,0.,0.0000000014,-1.6255469521<br>C,0.,0.0000000014,-2.7957387755<br>Cl,0.,0.0000000014,-4.403179356                                                                                                                                                |
|  | ph3f_nch MP2= -535.43013225 NIMAG= 0<br>P,0.,0.0000000014,0.600294238<br>F,0.,0.0000000014,2.1573567154<br>H,-0.0000000036,1.345477476,0.2794261362<br>H,1.165217675,-0.6727387328,0.2794261362<br>H,-1.1652176715,-0.672738739,0.2794261362<br>N,0.,0.0000000014,-1.7207690096<br>C,0.,0.0000000014,-2.8813259219<br>H,0.,0.0000000014,-3.9535423012                                                                                                                                              |

|  |                                                                                                                                                                                                                                                                                                                                                                                                                        |
|--|------------------------------------------------------------------------------------------------------------------------------------------------------------------------------------------------------------------------------------------------------------------------------------------------------------------------------------------------------------------------------------------------------------------------|
|  | <p>ph3f_ncf MP2= -634.53773402 NIMAG= 0<br/> P,0.,0.0000000014,0.6404816168<br/> F,0.,0.0000000014,2.1953018422<br/> H,-0.0000000036,1.3426560965,0.3068156279<br/> H,1.1627742887,-0.6713280431,0.3068156279<br/> H,-1.1627742851,-0.6713280492,0.3068156279<br/> N,0.,0.0000000014,-1.7131316609<br/> C,0.,0.0000000014,-2.8779338052<br/> F,0.,0.0000000014,-4.1223897859</p>                                       |
|  | <p>ph3f_nccn MP2= -627.49134879 NIMAG= 0<br/> P,0.,0.0000000014,0.7040865525<br/> F,0.,0.0000000014,2.2555229169<br/> H,-0.0000000035,1.3400438332,0.3566987831<br/> H,1.1605120023,-0.6700219114,0.3566987831<br/> H,-1.1605119987,-0.6700219175,0.3566987831<br/> N,0.,0.0000000014,-1.6934563043<br/> C,0.,0.0000000014,-2.8637655668<br/> C,0.,0.0000000014,-4.2387631835<br/> N,0.,0.0000000014,-5.4170486919</p> |
|  | <p>ph3f_n2 MP2= -551.50391259 NIMAG= 0<br/> P,0.,0.0105647817,0.0073352352<br/> F,0.,1.2674690996,0.8957973791<br/> H,1.1493838619,0.0611731415,-0.7695176211<br/> H,-1.1493838619,0.0611731415,-0.7695176211<br/> H,0.,-1.087945328,0.856124878<br/> N,0.,-2.1920095076,-1.5497376158<br/> N,0.,-3.1012946024,-2.1930556229</p>                                                                                       |

Table S2. The electron density at the BCP ( $\rho_{\text{BCP}}$ ), the Laplacian of the electron density at the BCP ( $\nabla^2\rho_{\text{BCP}}$ ), and the total energy density at the BCP ( $H_{\text{BCP}}$ ) of complexes  $\text{F}_{4-n}\text{H}_n\text{P}^+:\text{N-base}$

$\rho_{\text{BCP}}$

| Base  | $\text{F}_4\text{P}^+$ | $\text{F}_3\text{HP}^+$ | $\text{F}_2\text{H}_2\text{P}^+$ | $\text{FH}_3\text{P}^+$ |
|-------|------------------------|-------------------------|----------------------------------|-------------------------|
| NH3   | 0.122                  | 0.106                   | 0.091                            | 0.077                   |
| NCIH2 | 0.115                  | 0.098                   | 0.087                            | 0.073                   |
| NFH2  | 0.110                  | 0.090                   | 0.080                            | 0.067                   |
| NCI2H | 0.103                  | 0.088                   | 0.075                            | 0.070                   |
| NCI3  | 0.088                  | 0.076                   | 0.072                            | 0.066                   |
| NFCI2 | 0.082                  | 0.065                   | 0.065                            | 0.060                   |
| NF2H  | 0.086                  | 0.059                   | 0.040                            | 0.049                   |
| NF2CI | 0.063                  | 0.042                   | 0.046                            | 0.048                   |
| NF3   | 0.015                  | 0.018                   | 0.024                            | 0.030                   |
|       |                        |                         |                                  |                         |
| NCNH2 | 0.108                  | 0.085                   | 0.070                            | 0.059                   |
| NCCH3 | 0.101                  | 0.076                   | 0.061                            | 0.055                   |
| NP    | 0.108                  | 0.086                   | 0.070                            | 0.061                   |
| NCOH  | 0.097                  | 0.068                   | 0.054                            | 0.050                   |
| NCCI  | 0.092                  | 0.055                   | 0.048                            | 0.047                   |
| NCH   | 0.080                  | 0.039                   | 0.041                            | 0.043                   |
| NCF   | 0.069                  | 0.033                   | 0.037                            | 0.039                   |
| NCCN  | 0.023                  | 0.027                   | 0.032                            | 0.036                   |
| N2    | 0.010                  | 0.013                   | 0.015                            | 0.019                   |

$\nabla^2\rho_{\text{BCP}}$

| Base  | $\text{F}_4\text{P}^+$ | $\text{F}_3\text{HP}^+$ | $\text{F}_2\text{H}_2\text{P}^+$ | $\text{FH}_3\text{P}^+$ |
|-------|------------------------|-------------------------|----------------------------------|-------------------------|
| NH3   | 0.025                  | -0.015                  | -0.025                           | -0.001                  |
| NCIH2 | -0.030                 | -0.066                  | -0.037                           | 0.005                   |
| NFH2  | -0.013                 | -0.055                  | -0.019                           | 0.026                   |
| NCI2H | -0.096                 | -0.070                  | -0.018                           | 0.015                   |
| NCI3  | -0.097                 | -0.026                  | -0.002                           | 0.023                   |
| NFCI2 | -0.068                 | 0.008                   | 0.020                            | 0.041                   |
| NF2H  | -0.059                 | 0.030                   | 0.061                            | 0.064                   |
| NF2CI | -0.001                 | 0.059                   | 0.059                            | 0.065                   |
| NF3   | 0.048                  | 0.052                   | 0.062                            | 0.072                   |

$$\nabla^2\rho_{\text{BCP}}$$

|       |       |        |       |       |
|-------|-------|--------|-------|-------|
| NCNH2 | 0.152 | 0.030  | 0.034 | 0.064 |
| NCCH3 | 0.107 | 0.008  | 0.044 | 0.068 |
| NP    | 0.074 | -0.013 | 0.016 | 0.050 |
| NCOH  | 0.094 | 0.022  | 0.059 | 0.076 |
| NCCI  | 0.068 | 0.051  | 0.069 | 0.079 |
| NCH   | 0.016 | 0.072  | 0.075 | 0.082 |
| NCF   | 0.012 | 0.076  | 0.078 | 0.084 |
| NCCN  | 0.065 | 0.072  | 0.077 | 0.084 |
| N2    | 0.041 | 0.046  | 0.054 | 0.064 |

$$H_{\text{BCP}}$$

| Base  | F <sub>4</sub> P <sup>+</sup> | F <sub>3</sub> HP <sup>+</sup> | F <sub>2</sub> H <sub>2</sub> P <sup>+</sup> | FH <sub>3</sub> P <sup>+</sup> |
|-------|-------------------------------|--------------------------------|----------------------------------------------|--------------------------------|
| NH3   | -0.112                        | -0.091                         | -0.070                                       | -0.049                         |
| NCIH2 | -0.106                        | -0.081                         | -0.062                                       | -0.043                         |
| NFH2  | -0.098                        | -0.069                         | -0.053                                       | -0.034                         |
| NCI2H | -0.091                        | -0.062                         | -0.043                                       | -0.036                         |
| NCI3  | -0.064                        | -0.041                         | -0.037                                       | -0.032                         |
| NFCI2 | -0.055                        | -0.030                         | -0.029                                       | -0.025                         |
| NF2H  | -0.065                        | -0.024                         | -0.009                                       | -0.015                         |
| NF2CI | -0.031                        | -0.009                         | -0.012                                       | -0.014                         |
| NF3   | 0.001                         | 0.001                          | -0.001                                       | -0.003                         |
|       |                               |                                |                                              |                                |
| NCNH2 | -0.087                        | -0.061                         | -0.039                                       | -0.026                         |
| NCCH3 | -0.08                         | -0.049                         | -0.028                                       | -0.021                         |
| NP    | -0.091                        | -0.063                         | -0.039                                       | -0.027                         |
| NCOH  | -0.075                        | -0.036                         | -0.020                                       | -0.016                         |
| NCCI  | -0.071                        | -0.020                         | -0.014                                       | -0.014                         |
| NCH   | -0.057                        | -0.007                         | -0.009                                       | -0.010                         |
| NCF   | -0.043                        | -0.004                         | -0.006                                       | -0.008                         |
| NCCN  | -0.001                        | -0.001                         | -0.004                                       | -0.006                         |
| N2    | 0.002                         | 0.002                          | 0.001                                        | 0.001                          |

Figure S1. Plots of  $\rho_{\text{BCP}}$ ,  $\nabla^2\rho_{\text{BCP}}$ , and  $H_{\text{BCP}}$  (au) versus the P-N distance ( $\text{\AA}$ ) for complexes  $\text{F}_{4-n}\text{H}_n\text{P}^+:\text{N-base}$

■  $\text{sp}^3$  bases; □  $\text{sp}$  N-bases

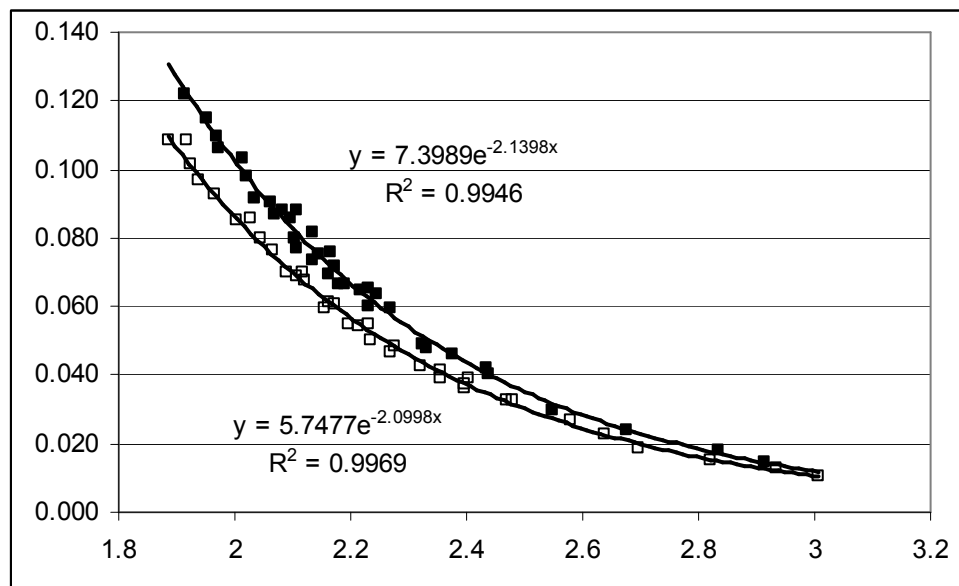

$\rho_{\text{BCP}}$

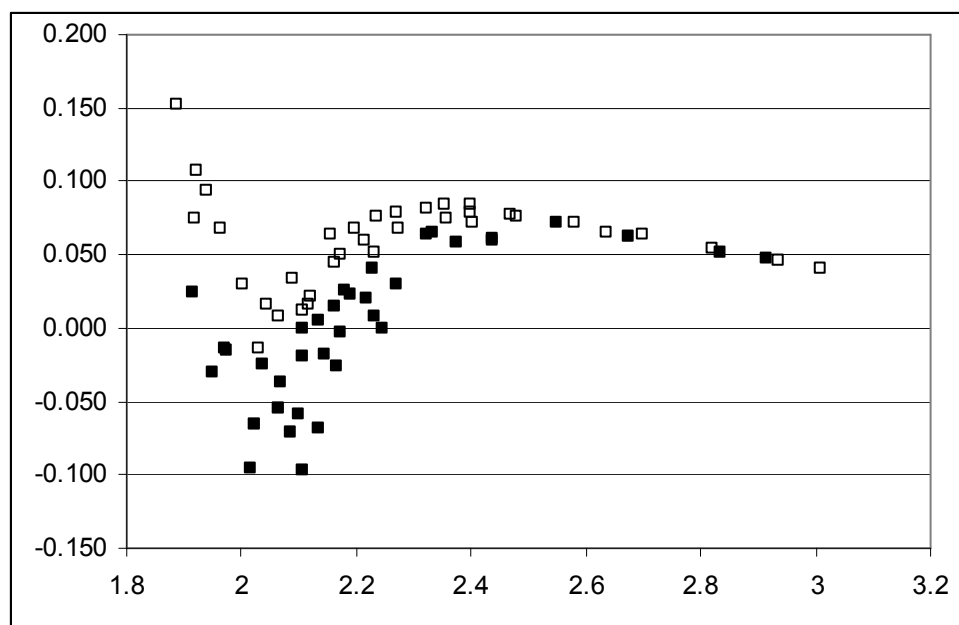

$\nabla^2\rho_{\text{BCP}}$

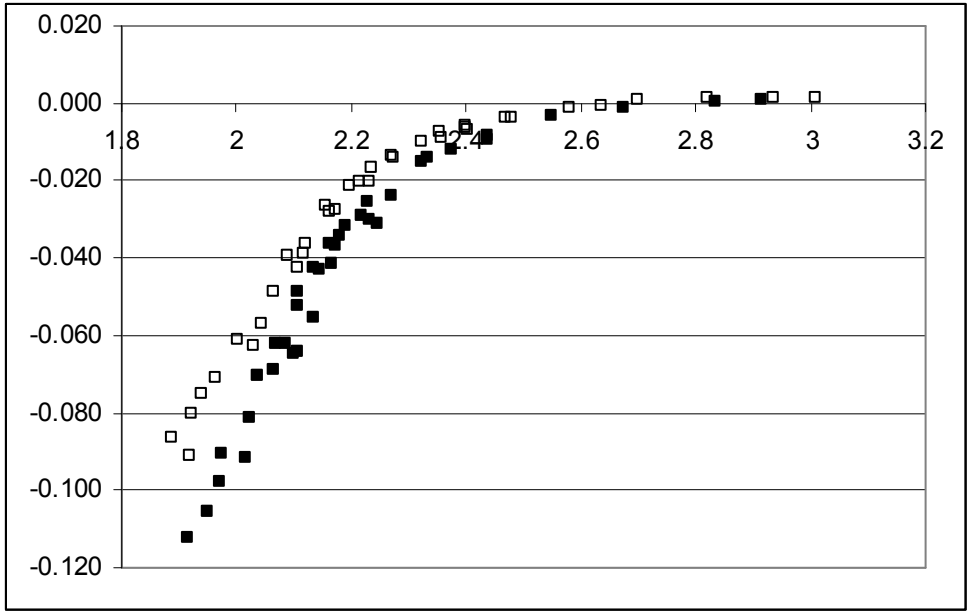

$H_{BCP}$



Table S3. Spin-spin coupling constants  $^1J(\text{P-N})$  and their components (Hz) for complexes of  $\text{F}_4\text{P}^+$ ,  $\text{F}_3\text{HP}^+$ ,  $\text{F}_2\text{H}_2\text{P}^+$ , and  $\text{FH}_3\text{P}^+$  with nitrogen bases

| F4P+:N-base   |      |      |       |      |                   |
|---------------|------|------|-------|------|-------------------|
|               | PSO  | DSO  | FC    | SD   | $^1J(\text{P-N})$ |
| NH3           | 0.8  | -0.2 | -25.8 | -1.7 | -26.9             |
| NFH2          | 0.5  | -0.2 | -19.0 | -1.7 | -20.3             |
| NP            | 1.1  | -0.2 | -15.2 | -0.8 | -15.1             |
| NCH           | 0.5  | -0.2 | 0.9   | -0.5 | 0.7               |
| NCF           | 0.4  | -0.2 | 8.6   | -0.3 | 8.4               |
| N2            | 0.1  | -0.1 | 1.5   | 0.0  | 1.5               |
| F3HP+:N-base  |      |      |       |      |                   |
| NH3           | 0.2  | -0.1 | 26.7  | -1.7 | 25.1              |
| NCIH2         | 0.3  | -0.2 | 31.0  | -1.3 | 29.9              |
| NFH2          | 0.5  | -0.1 | 34.2  | -1.2 | 33.4              |
| NF2H          | 0.2  | -0.1 | 26.9  | -0.4 | 26.6              |
| NCNH2         | 0.2  | -0.2 | 57.5  | -0.6 | 56.9              |
| NP            | 0.5  | -0.2 | 50.5  | -0.6 | 50.3              |
| NCOH          | 0.2  | -0.1 | 55.2  | -0.3 | 54.9              |
| NCH           | 0.0  | -0.1 | 19.8  | -0.1 | 19.6              |
| NCF           | 0.0  | -0.1 | 11.8  | -0.1 | 11.6              |
| N2            | 0.0  | -0.1 | -4.7  | 0.0  | -4.8              |
| F2H2P+:N-base |      |      |       |      |                   |
| NH3           | -0.8 | -0.1 | 33.4  | -1.6 | 30.9              |
| NH2CI         | -0.6 | -0.1 | 30.9  | -1.4 | 28.8              |
| NH2F          | -0.5 | -0.1 | 32.3  | -1.1 | 30.6              |
| NHF2          | 0.1  | -0.1 | -2.5  | -0.2 | -2.8              |
| NF3           | 0.1  | -0.1 | -14.0 | 0.0  | -14.0             |
| NHNNH2        | 0.0  | -0.1 | 52.8  | -0.4 | 52.2              |
| NCCH3         | -0.4 | -0.1 | 38.3  | -0.4 | 37.4              |
| NP            | 0.0  | -0.1 | 40.2  | -0.5 | 39.7              |
| NCOH          | -0.4 | -0.1 | 29.4  | -0.3 | 28.5              |
| NCCI          | -0.3 | -0.1 | 17.0  | -0.2 | 16.4              |
| NCH           | -0.3 | -0.1 | 4.5   | -0.2 | 3.9               |
| NCF           | -0.3 | -0.1 | -3.1  | -0.1 | -3.6              |
| NCCN          | -0.2 | -0.1 | -9.6  | -0.1 | -10.0             |
| N2            | 0.0  | -0.1 | -15.9 | 0.0  | -16.0             |

|              | PSO  | DSO  | FC    | SD   | $^1\text{pJ}(\text{P-N})$ |
|--------------|------|------|-------|------|---------------------------|
| FH3P+:N-base |      |      |       |      |                           |
| NH3          | -2.1 | -0.1 | 14.6  | -1.6 | 10.8                      |
| NCIH2        | -1.2 | -0.1 | 9.7   | -1.3 | 7.2                       |
| NFH2         | -0.5 | -0.1 | 7.1   | -0.9 | 5.6                       |
| NF2H         | 0.1  | -0.1 | -9.8  | -0.3 | -10.1                     |
| NF3          | 0.0  | -0.1 | -30.8 | 0.0  | -30.9                     |
| NCNH2        | -1.1 | -0.1 | 15.4  | -0.4 | 13.8                      |
| NCCH3        | -1.0 | -0.1 | 5.3   | -0.4 | 3.8                       |
| NP           | -0.4 | -0.1 | 7.6   | -0.3 | 6.8                       |
| NCOH         | -1.0 | -0.1 | -3.9  | -0.3 | -5.3                      |
| NCCI         | -0.8 | -0.1 | -11.1 | -0.3 | -12.3                     |
| NCH          | -0.7 | -0.1 | -18.5 | -0.2 | -19.5                     |
| NCF          | -0.7 | -0.1 | -26.3 | -0.2 | -27.3                     |
| NCCN         | -0.6 | -0.1 | -29.4 | -0.1 | -30.1                     |
| N2           | -0.2 | -0.1 | -30.9 | 0.0  | -31.2                     |

Table S4. Spin-spin coupling constants  $^1J(\text{P-F}_{\text{ax}})$  and their components (Hz) for complexes of  $\text{F}_4\text{P}^+$ ,  $\text{F}_3\text{HP}^+$ ,  $\text{F}_2\text{H}_2\text{P}^+$ , and  $\text{FH}_3\text{P}^+$  with nitrogen bases

| $\text{F}_4\text{HP}^+:\text{N-base}$ | PSO    | DSO | FC      | SD   | $^1J(\text{P-F}_{\text{ax}})$ |
|---------------------------------------|--------|-----|---------|------|-------------------------------|
| $\text{NH}_3$                         | -191.6 | 1.6 | -869.6  | 16.2 | -1043.4                       |
| $\text{NFH}_2$                        | -200.1 | 1.6 | -885.4  | 15.6 | -1068.3                       |
| NP                                    | -189.8 | 1.6 | -854.1  | 16.5 | -1025.8                       |
| NCH                                   | -202.9 | 1.6 | -872.7  | 16   | -1058.1                       |
| NCF                                   | -207.3 | 1.6 | -878.8  | 15.8 | -1068.8                       |
| $\text{N}_2$                          | -250.5 | 1.5 | -1041.7 | 13.1 | -1277.6                       |
| $\text{F}_4\text{P}^+$                | -257.4 | 1.4 | -1075.7 | 12.8 | -1318.9                       |
| $\text{F}_3\text{HP}^+:\text{N-base}$ |        |     |         |      |                               |
| $\text{NH}_3$                         | -187.8 | 1.2 | -873.8  | 19.3 | -1041.2                       |
| $\text{NCIH}_2$                       | -193.4 | 1.2 | -877.8  | 19.2 | -1050.8                       |
| $\text{NFH}_2$                        | -201.6 | 1.2 | -888.8  | 18.9 | -1070.3                       |
| $\text{NF}_2\text{H}$                 | -230.9 | 1.2 | -933.2  | 18.9 | -1144.0                       |
| $\text{NCNH}_2$                       | -91.5  | 0.4 | -735.6  | 41.7 | -785.0                        |
| $\text{NCCH}_3$                       | -97.9  | 0.4 | -751.5  | 41.6 | -807.4                        |
| NP                                    | -94.5  | 0.4 | -749.0  | 40.7 | -802.5                        |
| NCOH                                  | -101.0 | 0.3 | -762.3  | 42.2 | -820.7                        |
| NCCI                                  | -105.7 | 0.3 | -775.4  | 42.1 | -838.5                        |
| NCH                                   | -110.8 | 0.3 | -790.2  | 42.1 | -858.6                        |
| NCF                                   | -112.8 | 0.3 | -799.5  | 42.6 | -869.4                        |
| NCCN                                  | -118.2 | 0.3 | -814.2  | 42.1 | -889.9                        |
| $\text{N}_2$                          | -130.6 | 0.3 | -873.2  | 42.1 | -961.4                        |
| $\text{F}_3\text{HP}^+$               | -269.8 | 1.0 | -1065.7 | 16.1 | -1318.4                       |

F<sub>2</sub>H<sub>2</sub>P<sup>+</sup>:N-base

|                    |        |     |        |      |         |
|--------------------|--------|-----|--------|------|---------|
| NH <sub>3</sub>    | -159.7 | 0.7 | -812.3 | 24.8 | -946.4  |
| NH <sub>2</sub> Cl | -170.9 | 0.8 | -823.8 | 25.2 | -968.7  |
| NH <sub>2</sub> F  | -178.7 | 0.8 | -832.8 | 25.2 | -985.6  |
| NHF <sub>2</sub>   | -212.9 | 0.7 | -897.4 | 25.0 | -1084.5 |
| NF <sub>3</sub>    | -230.5 | 0.7 | -942.9 | 24.2 | -1148.4 |

|                   |        |     |        |      |         |
|-------------------|--------|-----|--------|------|---------|
| NCNH <sub>2</sub> | -173.0 | 0.7 | -810.7 | 26.4 | -956.5  |
| NCCH <sub>3</sub> | -181.8 | 0.7 | -825.1 | 26.6 | -979.7  |
| NP                | -174.7 | 0.7 | -820.8 | 26.1 | -968.7  |
| NCOH              | -188.5 | 0.7 | -836.2 | 26.8 | -997.1  |
| NCCI              | -195.9 | 0.7 | -851.9 | 26.5 | -1020.5 |
| NCH               | -203.8 | 0.7 | -869.6 | 26.3 | -1046.4 |
| NCF               | -208.4 | 0.7 | -880.3 | 26.2 | -1061.9 |
| NCCN              | -214.7 | 0.7 | -896.6 | 25.7 | -1084.9 |
| N <sub>2</sub>    | -232.9 | 0.6 | -951.3 | 24.2 | -1159.4 |

|                                              |        |     |        |      |         |
|----------------------------------------------|--------|-----|--------|------|---------|
| F <sub>2</sub> H <sub>2</sub> P <sup>+</sup> | -241.6 | 0.6 | -982.6 | 22.7 | -1200.9 |
|----------------------------------------------|--------|-----|--------|------|---------|

FH<sub>3</sub>P<sup>+</sup>:N-base

|                   |        |     |        |      |         |
|-------------------|--------|-----|--------|------|---------|
| NH <sub>3</sub>   | -187.8 | 1.2 | -873.8 | 19.3 | -1041.2 |
| NCIH <sub>2</sub> | -193.4 | 1.2 | -877.8 | 19.2 | -1050.8 |
| NFH <sub>2</sub>  | -201.6 | 1.2 | -888.8 | 18.9 | -1070.3 |
| NF <sub>2</sub> H | -230.9 | 1.2 | -933.2 | 18.9 | -1144.0 |

|                   |        |     |        |      |        |
|-------------------|--------|-----|--------|------|--------|
| NCNH <sub>2</sub> | -91.5  | 0.4 | -735.6 | 41.7 | -785.0 |
| NCCH <sub>3</sub> | -97.9  | 0.4 | -751.5 | 41.6 | -807.4 |
| NP                | -94.5  | 0.4 | -749.0 | 40.7 | -802.5 |
| NCOH              | -101.0 | 0.3 | -762.3 | 42.2 | -820.7 |
| NCCI              | -105.7 | 0.3 | -775.4 | 42.1 | -838.5 |
| NCH               | -110.8 | 0.3 | -790.2 | 42.1 | -858.6 |
| NCF               | -112.8 | 0.3 | -799.5 | 42.6 | -869.4 |
| NCCN              | -118.2 | 0.3 | -814.2 | 42.1 | -889.9 |
| N <sub>2</sub>    | -130.6 | 0.3 | -873.2 | 42.1 | -961.4 |

|                                |        |     |         |      |         |
|--------------------------------|--------|-----|---------|------|---------|
| FH <sub>3</sub> P <sup>+</sup> | -269.8 | 1.0 | -1065.7 | 16.1 | -1318.4 |
|--------------------------------|--------|-----|---------|------|---------|

Full references 36 and 50

(36) Frisch, M. J.; Trucks, G. W.; Schlegel, H. B.; Scuseria, G. E.; Robb, M. A.; Cheeseman, J. R.; Scalmani, G.; Barone, V.; Mennucci, B.; Petersson, G. A.; Nakatsuji, H.; Caricato, M.; Li, X.; Hratchian, H. P.; Izmaylov, A. F.; Bloino, J.; Zheng, G.; Sonnenberg, J. L.; Hada, M.; Ehara, M.; Toyota, K.; Fukuda, R.; Hasegawa, J.; Ishida, M.; Nakajima, T.; Honda, Y.; Kitao, O.; Nakai, H.; Vreven, T.; Montgomery, J., J. A.; Peralta, J. E.; Ogliaro, F.; Bearpark, M.; Heyd, J. J.; Brothers, E.; Kudin, K. N.; Staroverov, V. N.; Kobayashi, R.; Normand, J.; Raghavachari, K.; Rendell, A.; Burant, J. C.; Iyengar, S. S.; Tomasi, J.; Cossi, M.; Rega, N.; Millam, N. J.; Klene, M.; Knox, J. E.; Cross, J. B.; Bakken, V.; Adamo, C.; Jaramillo, J.; Gomperts, R.; Stratmann, R. E.; Yazyev, O.; Austin, A. J.; Cammi, R.; Pomelli, C.; Ochterski, J. W.; Martin, R. L.; Morokuma, K.; Zakrzewski, V. G.; Voth, G. A.; Salvador, P.; Dannenberg, J. J.; Dapprich, S.; Daniels, A. D.; Farkas, Ö.; Foresman, J. B.; Ortiz, J. V.; Cioslowski, J.; Fox, D. J. Gaussian 09, Gaussian, Inc., 2009.

(50) Stanton, J. F.; Gauss, J.; Watts, J. D.; Nooijen, M.; Oliphant, N.; Perera, S. A.; Szalay, P. G.; Lauderdale, W. J.; Gwaltney, S. R.; Beck, S.; Balkova, A.; Bernholdt, D. E.; Baeck, K.-K.; Tozyczko, P.; Sekino, H.; Huber, C.; Bartlett, R. J. ACES II is a program product of the Quantum Theory Project, University of Florida. Integral packages included are VMOL (J. Almlöf and Taylor PR); VPROPS (P. R. Taylor); ABACUS (T Helgaker, H. J. Aa. Jensen, P. Jørgensen, J. Olsen, and P. R. Taylor). Brillouin-Wigner perturbation theory was implement by J. Pittner.
